1 **An Effective Method for Terrestrial Arthropod Euthanasia**

2 Neil A. C. Bennie, Christopher D. Loaring, Mikaella M. G. Bennie and Steven A

3 Trim\*

4 Venomtech Limited, Canterbury, Kent, United Kingdom (UK).

5 \* Corresponding author – Venomtech Ltd., Kent Enterprise Hub, University of Kent,

6 Canterbury, Kent, CT2 7NJ. s.trim@venomtech.co.uk

7

8 **Summary**

9 As scientific understanding of invertebrate life increases so does the concern for how  
10 to end that life in a way that not only minimises (potential) suffering and is non-  
11 recoverable, but is also safe for those carrying out the procedure. There is increasing  
12 debate on the most appropriate euthanasia methods for invertebrates as their use in  
13 experimental research and zoological institutions grows. Their popularity as pet  
14 species has also lead to an increase in the need for greater veterinary understanding.  
15 Through the use of a local injection of potassium chloride (KCl) initially developed  
16 for use in American lobsters, this manuscript describes a safe and effective method for  
17 euthanasia in terrestrial invertebrates. Initial work focused on empirically determining  
18 the dose for cockroaches then extrapolating to other arthropod species. For this  
19 method of euthanasia, we propose the term '*targeted hyperkalemia*' to describe death  
20 through terminal depolarisation of the thoracic ganglia as a result of high potassium  
21 concentration.

22

23 **Key Words**

24 Arthropod, anaesthesia, euthanasia, potassium chloride (KCl), '*targeted hyperkalemia*'.

25

## 26 **Introduction**

27 A good death is an important part of a good life for all animals in captivity – and a  
28 lack of effective euthanasia methods for invertebrates has meant that the practice is  
29 not in tune with the theory. This gap in knowledge has gained significant attention  
30 recently (Cooper, 2011 and Murray, 2012), as moral concern grows over just what  
31 constitutes suffering in these animals. Suitable euthanasia methods need to be not only  
32 effective, irreversible and minimise pain, suffering and distress, they must be  
33 relatively simple to perform, acceptable to the person conducting the procedure  
34 (American Veterinary Medical Association (AVMA) guidelines, 2007), as well as  
35 compatible with any research involved.

36 Battison *et al.* (2000) published a new method of euthanasia for the American lobster  
37 (*Homarus americanus*) using injection of a saturated solution of potassium chloride  
38 (KCl). This method caused immediate immobilisation and death through circulatory  
39 arrest in around one minute and therefore fits the criteria for a euthanasia procedure.  
40 Currently anaesthesia followed by immersion in fixative such as 70% ethanol has  
41 been cited as a preferred method (Pizzi, 2012) but it is inappropriate for microbiology  
42 (Cooper, 2011) or RNA extraction. Freezing is often suggested by private and  
43 professional keepers, but this compromises histological examination and is  
44 increasingly regarded to be inhumane (Pizzi, 2012) without prior anaesthesia to a  
45 depth at which recovery is impossible before death from freezing.

46 This study extrapolates the work performed by Battison *et al.* (2000) to a range of  
47 terrestrial arthropod phyla. Our aim is to produce a universal method of arthropod  
48 euthanasia that is not only more effective than current methods, but is quicker, more  
49 economical and - importantly for transcriptomic and proteomic studies - preserves  
50 tissue quality.

51 Animal nervous systems contain ion channels permeable to potassium and sodium,  
52 which respectively control the flow of these ions across the cell membrane and  
53 subsequently the electrical potential. In the field of electrophysiology it is well know  
54 that neurones at a resting potential maintain a high intracellular potassium  
55 concentration and low intracellular sodium concentration relative to the extracellular  
56 environment. Addition of extracellular potassium ions ( $K^+$ ) in the form of KCl  
57 immediately depolarises the cell through neutralisation of the potassium concentration  
58 gradient across the cell membrane. This resulting change in potential (voltage) across  
59 the cell membrane causes opening of voltage-gated sodium channels. Thus, excess  
60 extracellular KCl causes exaggerated sodium influx that depolarises the cell and  
61 becomes toxic to it. The excess  $K^+$  remaining in the extracellular environment also  
62 prevents repolarisation (Takahashi *et al*, 1999). Therefore application of excess  $K^+$   
63 around the neurones of the thoracic ganglia in the form of KCl abolishes the neural  
64 input and results in circulatory collapse and then death.

65 Evolutionarily conserved across a wide range of arthropod orders, the arthropod  
66 ventral nerve cord – with some exceptions - is positioned on the ventral midline and  
67 exhibits a chain of serial ganglia. The anterior ganglia are the largest and have been  
68 referred to as the ‘invertebrate brain’ (Gullan and Cranston, 1998) but their main role  
69 is processing the large amount of sensory input from the head. Therefore destruction  
70 of the brain in invertebrates principally affects the input of sensory information from  
71 the eyes and antenna but not from the rest of the body. Consequently a method of  
72 euthanasia targeting the ganglia that control the vital functions would be a more  
73 appropriate way to successfully terminate arthropod life.

74 Humans are not the first species to use  $K^+$  ions as pharmacological tools; scorpions  
75 have evolved to utilise  $K^+$  ions. Parabuthus species possess potent venom peptides

76 that act on many ion channels (including  $K^+$  channels). Yet they have also evolved a  
77 prevenom with a high concentration of  $K^+$  ions of around 80 mM (Inceoglu *et al.*  
78 2002). Inceoglu *et al.* (2002) studied the effect of this prevenom on two insect species  
79 (*Trichoplusia ni* and *Sarcophagia bullata*) and concluded it is an energy efficient way  
80 of prey capture through paralysis. We demonstrate that if  $K^+$  is delivered directly to  
81 the thoracic ganglia, its effects are rapid and avoid generating potential nociceptive  
82 action potentials.

83 We hereby propose the term '*targeted hyperkalsosis*' to describe the euthanasia of  
84 invertebrates through local injection of  $K^+$  to deliberately depolarise the thoracic  
85 ganglia and bring about rapid death. The direct derivation of '*targeted hyperkalsosis*' is  
86 local, high potassium state which accurately describes the method.

87

## 88 **Materials and Methods**

89 All animals used in this study were euthanised to provide tissue for other research  
90 projects and, as such, the development of a suitable method of euthanasia was  
91 required. Although the species involved are not currently legally protected, they were  
92 maintained under the ethos of the UK Animals Scientific Procedures Act 1986,  
93 (A(SP)A).

94 All animals were acclimatised for two weeks to confirm health and nutritional status,  
95 and were weighed during total anaesthesia.

96

## 97 **Assessment of Proposed Injection Volume**

98 Prior to any dosing studies, six giant cockroach nymphs (*Blaberus giganteus*  
99 (Linnaeus, 1758)) were anaesthetised in the manner described below and allowed to  
100 recover in fresh air to record a baseline recovery time.

101 Ten nymphs, average weight 3.25 g (+/- 1.03 g), were anaesthetised individually in a  
102 670 ml anaesthesia chamber (Reed *et al.* 2011) which delivered carbon dioxide (CO<sub>2</sub>)  
103 at 0.5 litres per minute through a low range flow meter (Harvard Apparatus, UK).  
104 Once anaesthetised, nymphs were abdominally injected with sterile Ringers solution  
105 at 100 ul/g body weight, allowed to recover, and then monitored for signs of unusual  
106 behaviour and / or illness. The time taken for full induction (i.e. abolishment of the  
107 righting reflex) and any movement were recorded along with that of the recovery  
108 time. The time to full recovery was defined as the return of the righting reflex. This  
109 was important as it enabled us to establish when recovery was expected.

110

#### 111 **Development of Euthanasia Method**

112 Rather than performing a full dose response curve, three dose groups were selected to  
113 assess the initial efficacy of KCl as a method of euthanasia; this was to reduce the  
114 number of animals receiving a toxic but non fatal dose. As a suitable euthanasia  
115 protocol needs to be effective for every animal every time, standard toxicological  
116 parameters such as LD<sub>50</sub> (lethal dose in 50% of population) and LD<sub>90</sub> (lethal dose in  
117 90% of population) were not deemed necessary for this study. KCl was dissolved at  
118 300 mg/ml in sterile water, which avoids the need for an incubation step as conducted  
119 by Battison *et al.* (2000) and eliminates the risk of precipitation if the solution is kept  
120 at cooler temperatures. The solution was sterile filtered through a 0.2 µm filter (Merck  
121 Millipore, Watford, Hertfordshire, UK) and aliquoted for storage in 1.5 ml centrifuge  
122 tubes (Fisher Scientific, Loughborough, Leicestershire, UK).

123 *B. giganteus* were anaesthetised as previously described and injected with 300 mg/ml  
124 KCl into the first leg sinus via the arthroal membrane (**Fig. 1**) using a 25G needle  
125 and 1 ml syringe (Fisher Scientific, Loughborough, Leicestershire, UK). Doses

126 assessed were 10 µl/g (n=5 animals 2.72 g +/- 1.26 g), 50 µl/g (n=5 animals 2.92 g +/-  
127 0.71 g) and 100 µl/g (n=10 animals 2.49 g +/- 0.42 g). Double the number of animals  
128 was used in the higher dose group to confirm 100% fatality rate.

129

### 130 **Extrapolation of Euthanasia Method in Other Species**

131 In order to determine the effectiveness of KCl euthanasia in different terrestrial  
132 invertebrates, we tested the method in eight other invertebrate species from eight  
133 orders (**table 1**).

134 Injections for *G. bimaculatus*, and *L.migratoria* were administered in the first leg  
135 sinus via the arthroal membrane. In *H. membranacea*, the injection was via the  
136 arthroal membrane but in the second leg sinus.

137 Myriapoda species *S. polymorpha* and *N. americanus* were injected into the joint  
138 between the second and third segment along the ventral midline (**fig. 2**). Phasmids  
139 were injected into the ventral midline at the junction between the first leg plate and  
140 adjacent ventral plate (**Fig. 3**).

141

142 *A. cordubensis* and *H. troglodytes* were selected based on the requirement for their  
143 venom glands. *A. cordubensis* were dosed centrally via the sternum (**fig. 4**) while *H.*  
144 *troglodytes* were injected into the junction between the second leg coxa and the  
145 sternum, rostrally to the genital operculum (**fig. 5**).

146

### 147 **Results**

148 A rising concentration of CO<sub>2</sub> was effective at reversibly anaesthetising, and therefore  
149 immobilising, all species used during this study. Individuals from several insect  
150 species (particularly *Blattodea* and *Phasmidae*) were observed to vomit during

151 anaesthesia and occasional exaggerated limb movements were noted. Little other  
152 evidence of distress was observed.

153

#### 154 **Assessment of Proposed Injection Volume**

155 Initial baseline data for *B. giganteus* anaesthesia induction was 1min28s (+/- 6  
156 seconds) for full anaesthesia with recovery taking 1min41s (+/- 13 seconds). After  
157 injection of 10% v/w of body weight of sterile Ringers solution whilst under  
158 anaesthesia, animals recovered in 1min46s (+/- 9 seconds). No unusual behaviour was  
159 noted in the 48 hours' observation time post injection and, subsequently, no further  
160 observations were taken. The *E. calcarata* nymph given 100 µl/g sterile Ringers  
161 solution into the ventral thoracic cavity recovered after six minutes and showed no  
162 detectable behavioural differences up to and beyond the 48 hours' observation time.  
163 This demonstrates that the large volume alone (10% v/w of body weight) does not  
164 cause any noticeable effect on survival or behaviour.

165 Battison *et al.* (2000) used ultrasonography to confirm circulatory arrest in *H.*  
166 *americanus*; in this study the authors relied upon irreversible cessation of movement  
167 and sensation which was defined as no movement or recovery during a 24 hour  
168 period. Doses of 1% and 5% v/w KCl in *B. giganteus* were non fatal; 5 % v/w caused  
169 marked local paralysis of forelimbs and antennae which persisted for over one minute;  
170 10% v/w of KCl caused instant paralysis and inward contraction of the limbs as well  
171 as total abolishment of all nociceptive responses and non recovery within 24hrs.  
172 Therefore 10% v/w was identified as the 100% effective dose for follow on studies.

173

#### 174 **Results of Extrapolation of Euthanasia Method to Other Species**

175 In *G. bimaculatus* 10% v/w was immediately effective in all but one individual.  
176 However, this was a suspected inaccurate dosing as for such small species a 33G  
177 needle is required to limit leakage and maintain accuracy. For *L. migratoria*, *H.*  
178 *membranacea* and *E. calcarata* 10% v/w KCl euthanasia was effective in all animals.  
179 The only unusual observation made was the forceful autotomisation of a rear leg by  
180 one *L. migratoria*.

181 The *Myriapoda* unique body plan presented a challenge as nerve ganglia and heart  
182 tissue are duplicated throughout its length; this most likely brought about the results  
183 observed. The *N. americanus* responded to 10% v/w KCl with a wave of paralysis  
184 moving anterior to posterior with a maximum latency to death of 13 seconds. Over  
185 half of the study group (four animals) were deemed dead before removal of the  
186 needle. The passage of paralysis anterior to posterior was slower in *S. polymorpha*,  
187 but after a single dose of 10% v/w KCl none of the study group had died within 10  
188 minutes. Immediate paralysis of the anterior segments was evident in all animals  
189 while the posterior three segments remained active in all animals. A second dose of  
190 10% v/w KCl was required and resulted in immediate cessation of all movement. As  
191 such, a 20% v/w KCl final dose was effective in all the *S. polymorpha* tested and was  
192 therefore proposed as the protocol for the *Chilopoda* class of *Arthropoda*.

193 The 10% v/w KCl dose in the *H. troglodytes* caused immediate paralysis and death in  
194 all animals signified by contraction of the limbs and ablation of responses to noxious  
195 stimuli (limb crush).

196 Initial studies on the *Theraphosidae* revealed that injection of 10% v/w into the  
197 central nerve ganglion was not possible due to volume limitations and a substantial  
198 back pressure was observed in the syringe. Although it was not possible at this time to  
199 record haemolymph pressure in the *Theraphosidae* prosoma - and the authors are



200 unaware of any articles on the subject - reducing the dose to 0.5% v/w and leaving the  
201 syringe in place for 10 seconds resolved the issue. Thus 0.5% v/w can be injected into  
202 the central sternum as this is technically easier than reaching the ganglia through an  
203 arthroidal membrane.  
204 Injection of 0.5 % v/w administered centrally via the sternum was effective in ablating  
205 the nervous system and caused death in all animals. 0.5 % v/w injected into the  
206 prosoma ganglia is terminal and non recoverable in *Theraphosidae*; haemolymph can  
207 be collected via cardiac puncture but only for approximately one minute as this  
208 appears to be when the circulation stops. During development of this protocol the  
209 authors discovered that direct intra-cardiac delivery of 1% v/w KCl is also an  
210 effective euthanasia method for *Theraphosidae* spiders but it does not appear to work  
211 for araneomorpha spiders (data not shown). Thus the proposed spider protocol is 0.5%  
212 v/w delivered directly to the prosoma ganglia.

213

#### 214 **Other Species Tested**

215 Representatives of other insect orders can also be euthanised with 10% v/w KCl  
216 administered directly via injection to the thoracic ganglia though the sternal  
217 membrane between the forelegs in the ventral midline. Adult species tested were the  
218 lesser wax moth, (*Achroia grisella* (Fabricius, 1794)); Lepidoptera), hover fly  
219 (unknown sp.; Diptera) and several beetles (*Pachnoda marginata* (Drury, 1773)),  
220 *Smaragdesthes africana oertzeni* (Kolbe, 1895) and *Dicronorrhina derbyana conradsi*  
221 (Kolbe, 1909); Coleoptera). For euthanasia of the small insects, a 10  
222 MICROLITER™ glass syringe (Hamilton Company, Reno, Nevada, USA) was used  
223 with a 25G needle.

224 The data presented here is summarised in **Table 2** as a list of proposed euthanasia  
225 protocols listed against order. For heavily armoured arthropods such as the  
226 crustaceans, the thoracic ganglia can be reached through the arthroidial membrane  
227 sinus (Battison *et al.* 2000). For terrestrial arthropods the ventral midline should be  
228 used where possible.

229

### 230 **Discussion**

231 The data presented here demonstrates that KCl is a rapid and effective method of  
232 causing irreversible death in the arthropod species tested. With training this method is  
233 easy to perform and causes immediate death that allows rapid tissue collection for  
234 experimental transcriptomic and proteomic studies. An understanding of the species'  
235 specific neural anatomy is critical to performing this technique. As such, it is  
236 important that this is understood prior to working with such animals.

237 Before obtaining vertebrates for scientific study, it is vital that staff can identify  
238 potential suffering and are proficient in carrying out euthanasia. This is detailed in the  
239 A(SP)A and we feel this approach should be adopted for invertebrates too. KCl is an  
240 ideal agent for euthanasia as it is cheap, effective, doesn't require any special storage,  
241 has a very long shelf life and is safe to use. KCl is compatible with a wider range of  
242 pathological and research investigations than any of the current protocols (such as  
243 transcriptomics and proteomics) with the exception of primary neuronal culture due to  
244 the nature of action. However, there are still situations where KCl is impractical such  
245 as for very small species (e.g. *Drosophila sp.*) or when culling large numbers of  
246 invertebrates, not required for tissue. In these instances anaesthesia followed by a  
247 confirmatory procedure such as immersion in fixative or rapid freezing should be

248 performed, but only as long as the anaesthesia is deep enough so death occurs before  
249 recovery is possible.

250

## 251 **Acknowledgements**

252 Thanks to Dr Carol Trim for critical review

253

## 254 **Funding**

255 This research was funded internally by Venomtech Ltd and therefore received no  
256 specific grant from any funding agency in the public, commercial or not-for-profit  
257 sectors.

258

## 259 **Symbols / Abbreviations**

260 A(SP)A: Animals Scientific Procedures Act 1986

261 AVMA: American Veterinary Medical Association,

262 CO<sub>2</sub>: carbon dioxide

263 KCl: potassium chloride

264 LD<sub>50</sub>: lethal dose in 50% of population

265 LD<sub>90</sub>: lethal dose in 90% of population

266 v/w: volume by weight

267

## 268 **References**

- 269 1. American Veterinary Medical Association, AVMA Guidelines on Euthanasia  
270 2007. Available: [http://www.avma.org/issues/animal\\_welfare/euthanasia.pdf](http://www.avma.org/issues/animal_welfare/euthanasia.pdf)  
271 Last accessed 13<sup>th</sup> May 2012  
272
- 273 2. Battison, A., MacMilan, R., MacKenzie, A., Rose, P., Cawthorn, R., and  
274 Horney, B., (2000). Use of Injectable Potassium Chloride for Euthanasia of  
275 American Lobsters (*Homarus americanus*). *Comparative Medicine* **50(5)**, 545-  
276 550

277  
278  
279  
280  
281  
282  
283  
284  
285  
286  
287  
288  
289  
290  
291  
292  
293  
294  
295  
296  
297  
298  
  
299  
  
300  
  
301  
  
302  
  
303  
  
304  
  
305  
  
306  
  
307  
  
308  
  
309  
  
310  
  
311  
  
312

3. Cooper, J.E., (2011). Anaesthesia, Analgesia and Euthanasia of Invertebrates. *Institute for Laboratory Animal Research Journal* **52(2)**, 196-204
4. Gullan, P.J. and Cranston, P.S., (1998). 3.2 The nervous system and coordination. In *The Insects – An Outline of Entomology*, pp.061-065. London: Chapman and Hall.
5. Inceoglu, B., Lango, J., Jing, J., Chen, L., Doymaz, F., Pessah, I. N., and Hammock, B. D., (2003). One scorpion, two venoms: Prevenom of *Parabuthus transvaalicus* acts as an alternative type of venom with distinct mechanism of action. *Proceedings of the National Academy of Sciences*, **100(3)**, 922-927.
6. Murray MJ., (2012). Euthanasia. In *Invertebrate Medicine*, (ed. Lewbart, G. A. and Ames, I. A.) pp.441-443. Oxford: Blackwell Publishing.
7. Pizzi R., (2012). Euthanasia. In *Invertebrate Medicine*, (ed. Lewbart, G. A. and Ames, I. A.) pp.441-443. Oxford: Blackwell Publishing.

313

314

315 **Appendix I: Figure Titles and legends**

316 **FIG. 1 BLATTODEA INJECTION SITE**

317 This diagram demonstrates the location of the first arthodial membrane used for euthanasia by targeted hyperkalemia  
318 in cockroaches (*Blaberus giganteus*, order *Blattodea*).

319 **FIG. 2 CHILOPODA INJECTION SITE**

320 The location of the ventral midline injection site between segments two and three for centipedes (*Solopendra*  
321 *polymorpha*, order *Chilopoda*).

322 **FIG. 3 PHASMIDAE INJECTION SITE**

323 Ventral midline (*Eurycantha calcarata*, order *Phasmidae*) illustrated by the red arrow.

324 **FIG. 4 THERAPHOSIDAE INJECTION SITE**

325 Central sternum injection site in *Acanthoscurria cordubensis*, order Theraphosidae.

326 **FIG. 5 SCORPION INJECTION SITE**

327 Dosing site for *Hadogenes troglodytes*, order Scorpiones

328

329

330

331

332

333

334

335

336

337

338

339

340

341

342 **Appendix II Table Titles and Footnotes**343 **TABLE 1: KCI EUTHANASIA TEST SPECIES' DOSING TABLE**

| Species                                                                      | Life stage | n= | (g)*      | (g)<br>s.d.** | Dosing      |
|------------------------------------------------------------------------------|------------|----|-----------|---------------|-------------|
| African field cricket ( <i>Gryllus bimaculatus</i> , (De Geer, 1773))        | Adult      | 6  | 0.97      | +/-0.22       | 10 % v/w*** |
| Migratory locust ( <i>Locusta migratoria</i> (Linnaeus, 1758))               | Adult      | 6  | 1.62      | +/-0.29       | 10 % v/w    |
| Giant Asian mantid ( <i>Hierodula membranacea</i> , (Burmeister, 1838))      | Nymph      | 5  | 0.39      | +/-0.06       | 10 % v/w    |
| Sonoran desert centipede ( <i>Scolopendra polymorpha</i> , (Wood, 1861))     | Juvenile   | 5  | 0.32      | +/-0.2        | 20 % v/w    |
| Florida millipede ( <i>Narceus americanus</i> , (Palisot de Beauvois, 1817)) | Juvenile   | 7  | 2.87      | +/-0.81       | 10 % v/w    |
| Giant spiny stick insect ( <i>Eurycantha calcarata</i> , (Lucas, 1869))      | Nymph      | 8  | 2.00      | +/-0.89       | 10 % v/w    |
| <i>Acanthoscurria cordubensis</i> (Thorell, 1894)                            | Sub-adult  | 10 | 18.6<br>8 | +/-3.21       | 0.5 % v/w   |
| Flat rock scorpion ( <i>Hadogenes troglodytes</i> (Peters, 1861))            | Juvenile   | 9  | 5.08      | +/-2.59       | 10 % v/w    |

344 \* average weight in grams

345 \*\*standard deviation of average weight in grams

346 \*\*\*volume by weight

347

348 **TABLE 2 SUMMARY OF EUTHANASIA DOSE PROTOCOLS**

| Group      | Common name   | Injection site                    | Dose     |
|------------|---------------|-----------------------------------|----------|
| Blattodea  | Cockroaches   | Between first pair of legs        | 10% v/w  |
| Phasmidae  | Stick insects | Between first pair of legs        | 10% v/w  |
| Diplopoda  | Millipedes    | Between second and third segments | 10% v/w  |
| Chilopoda  | Centipedes    | Between second and third segments | 20% v/w  |
| Orthoptera | Grasshoppers  | Between first pair of legs        | 10% v/w  |
| Aranae     | Spiders       | Mid-sternum                       | 0.5% v/w |
| Scorpiones | Scorpions     | Between second pair of legs       | 10% v/w  |
| Mantodea   | Mantids       | Between first pair of legs        | 10% v/w  |
| Coleoptera | Beetles       | Between first pair of legs        | 10% v/w  |
| Diptera    | Flies         | Between first pair of legs        | 10% v/w  |

349

350

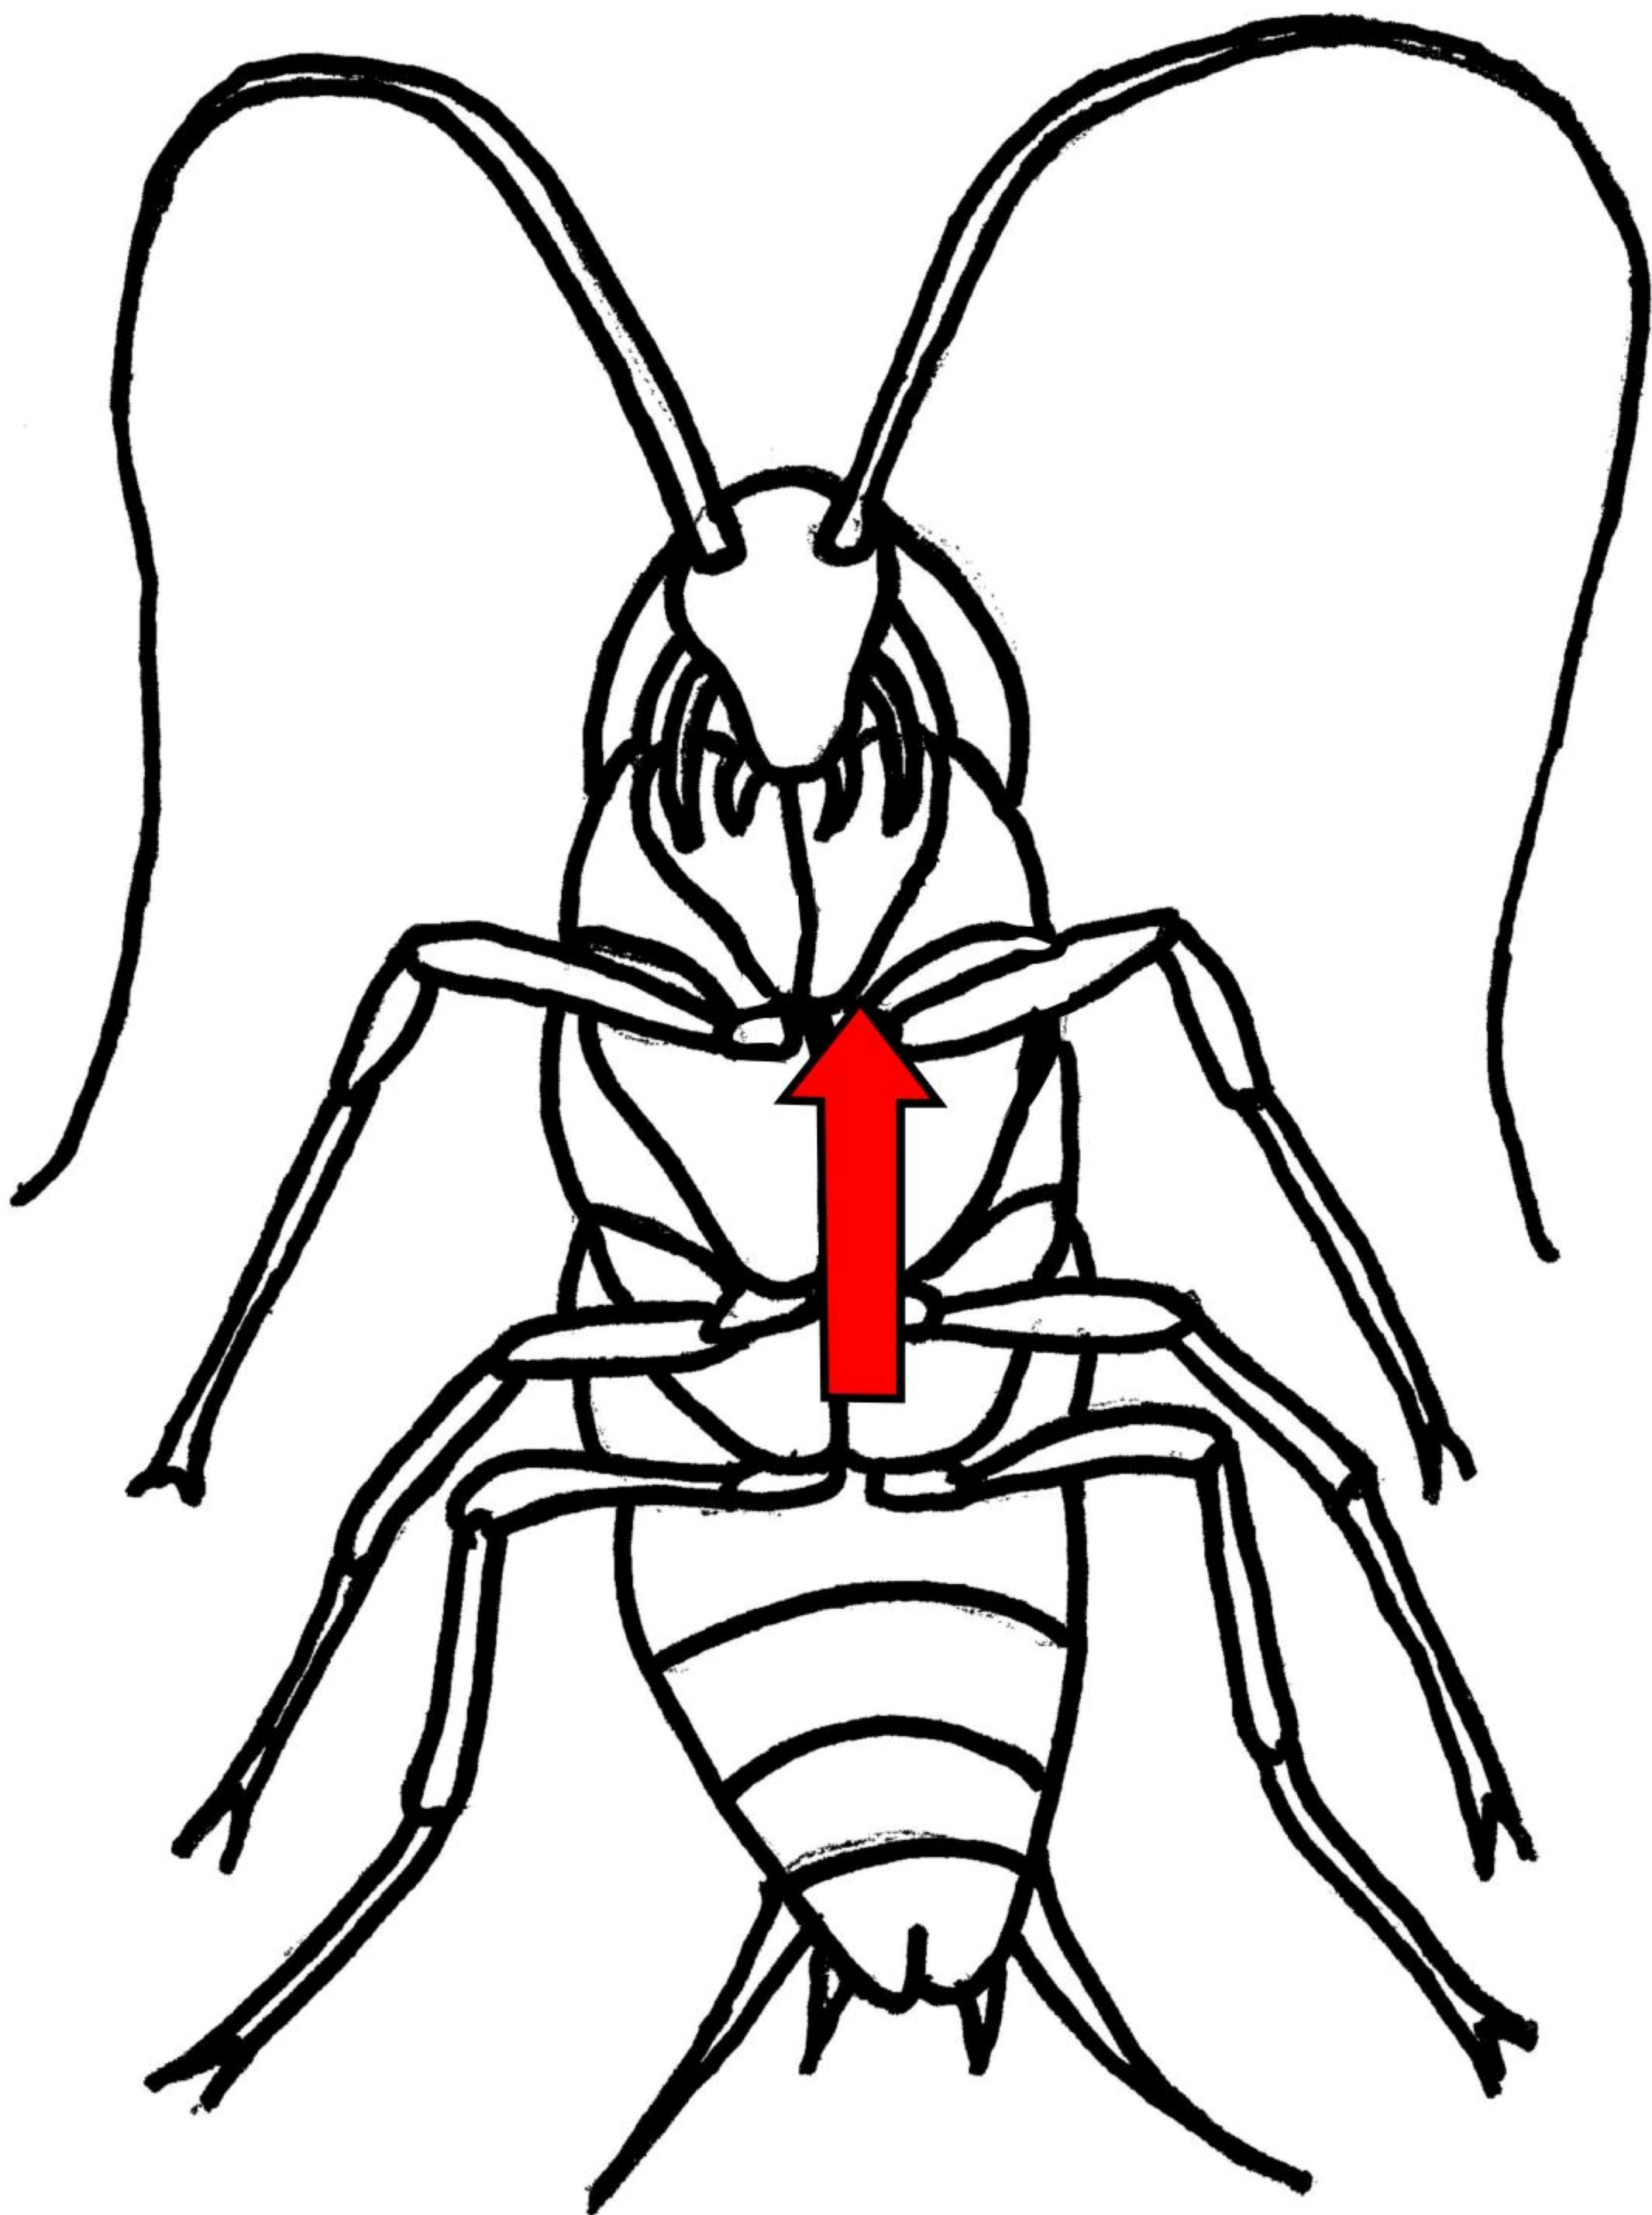

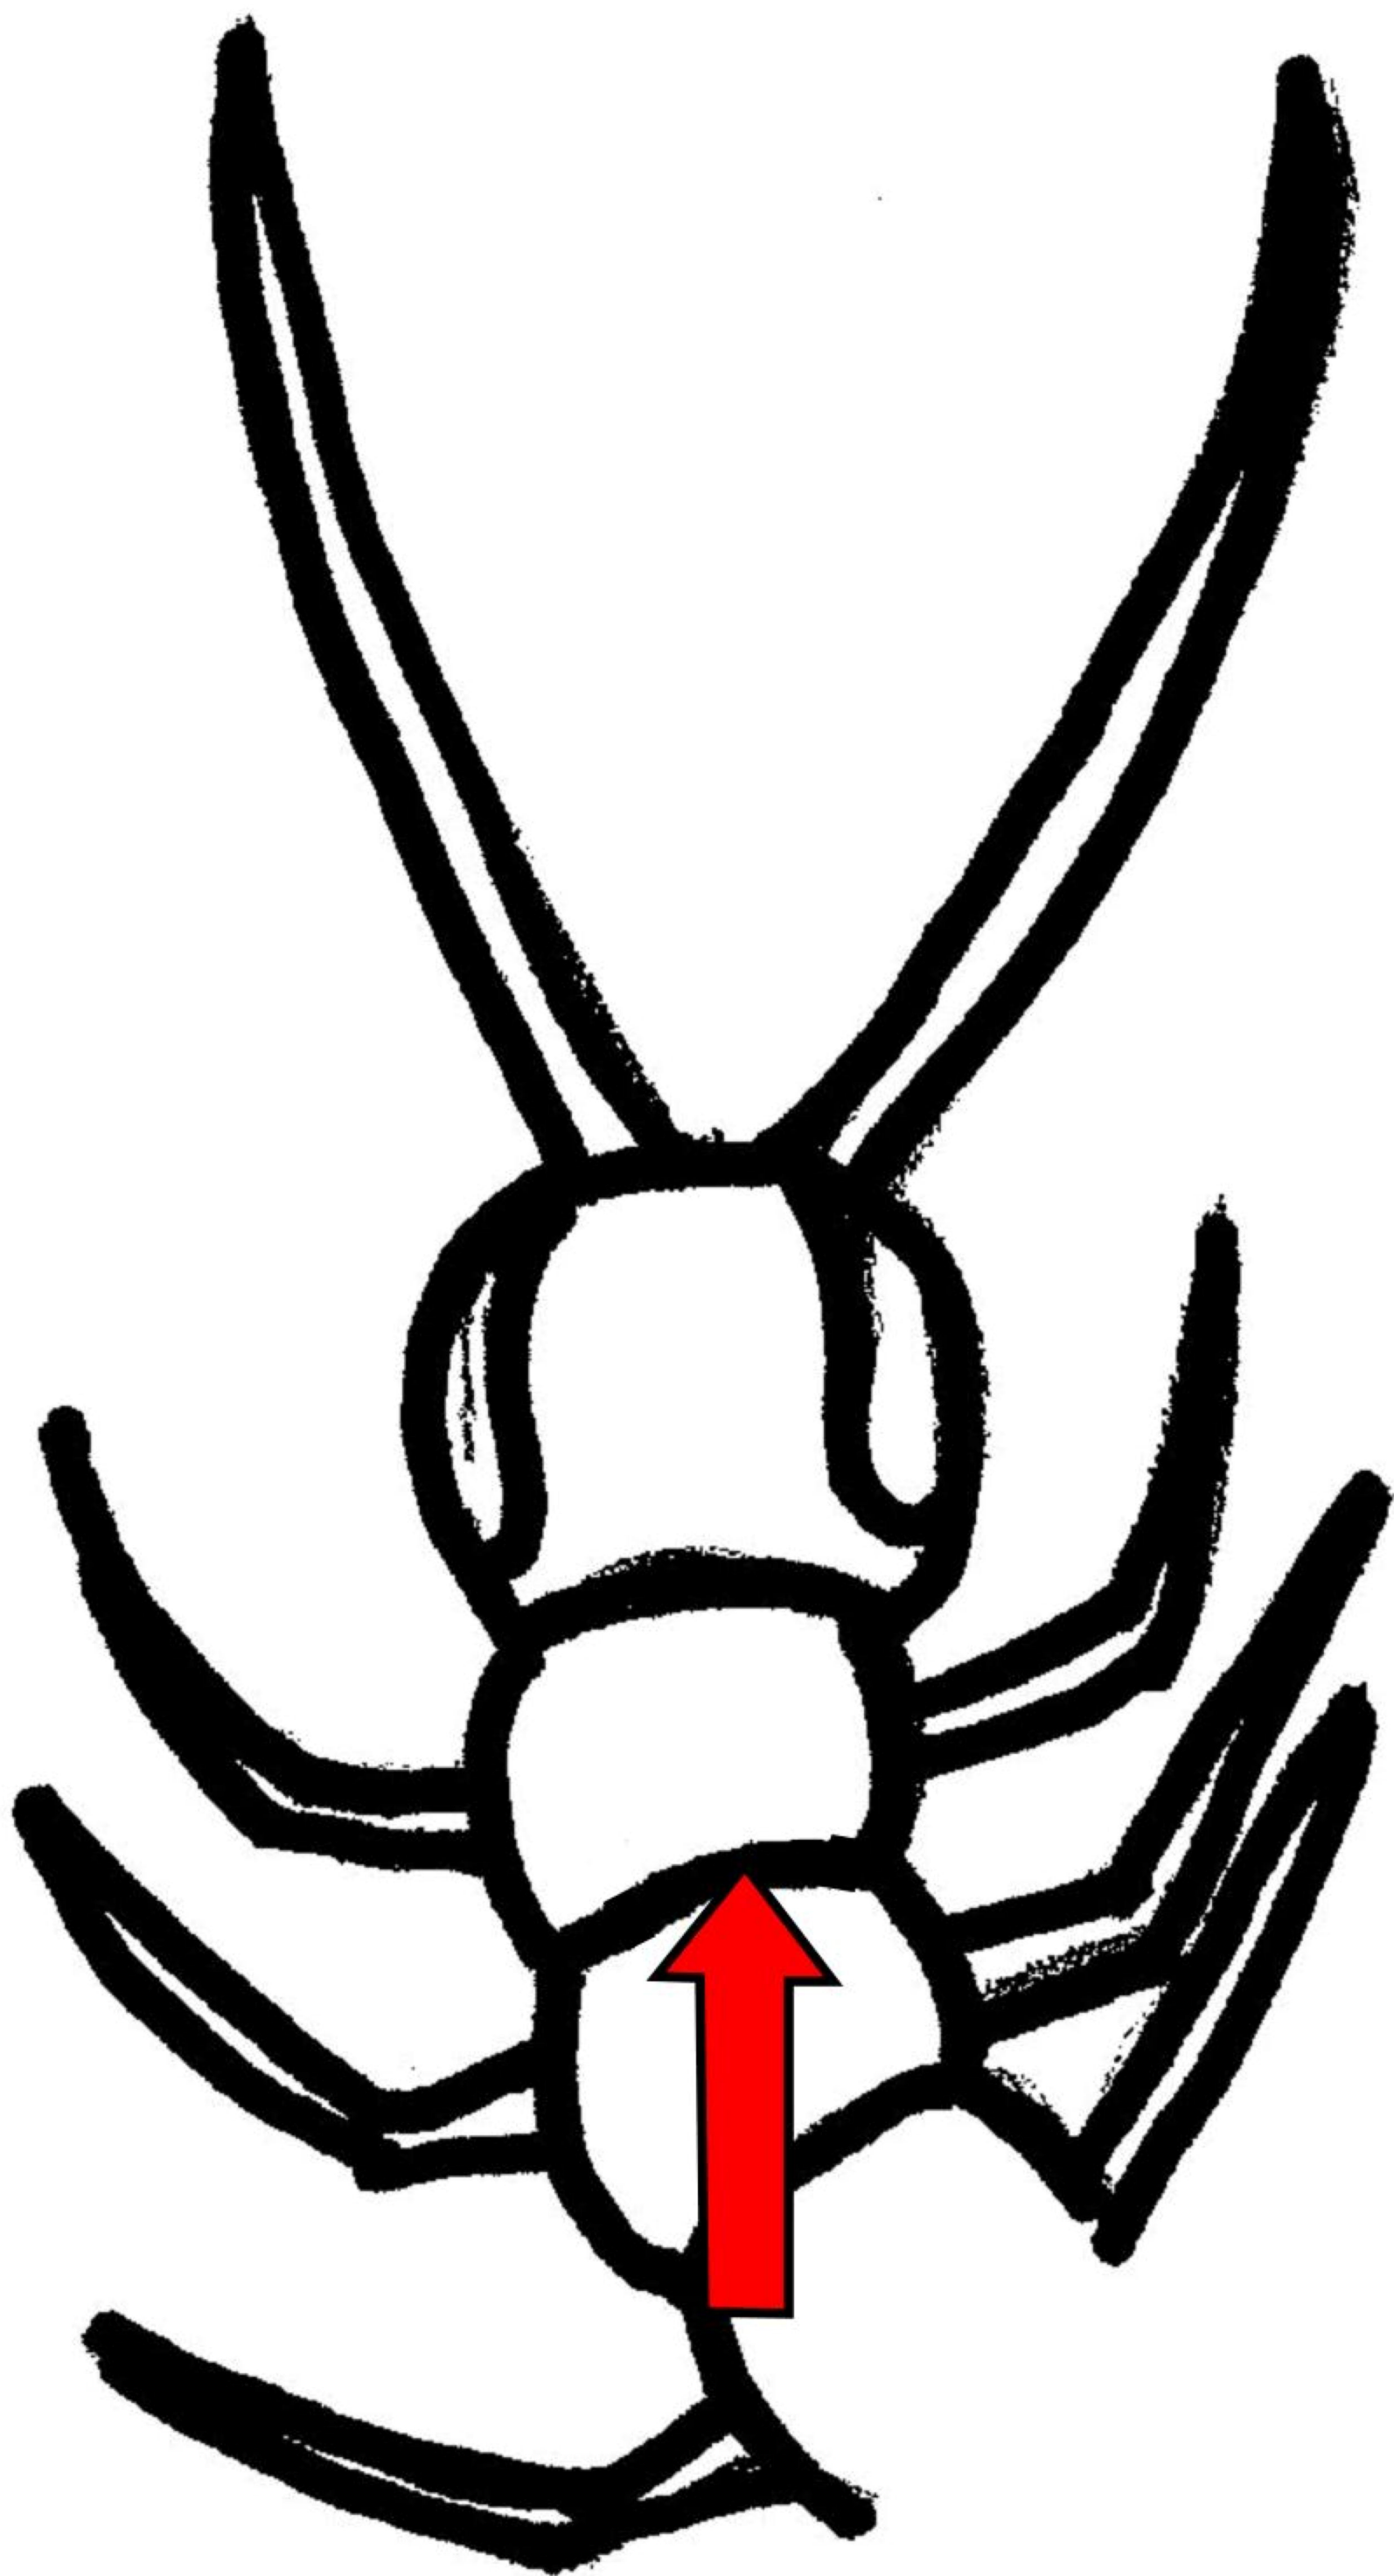



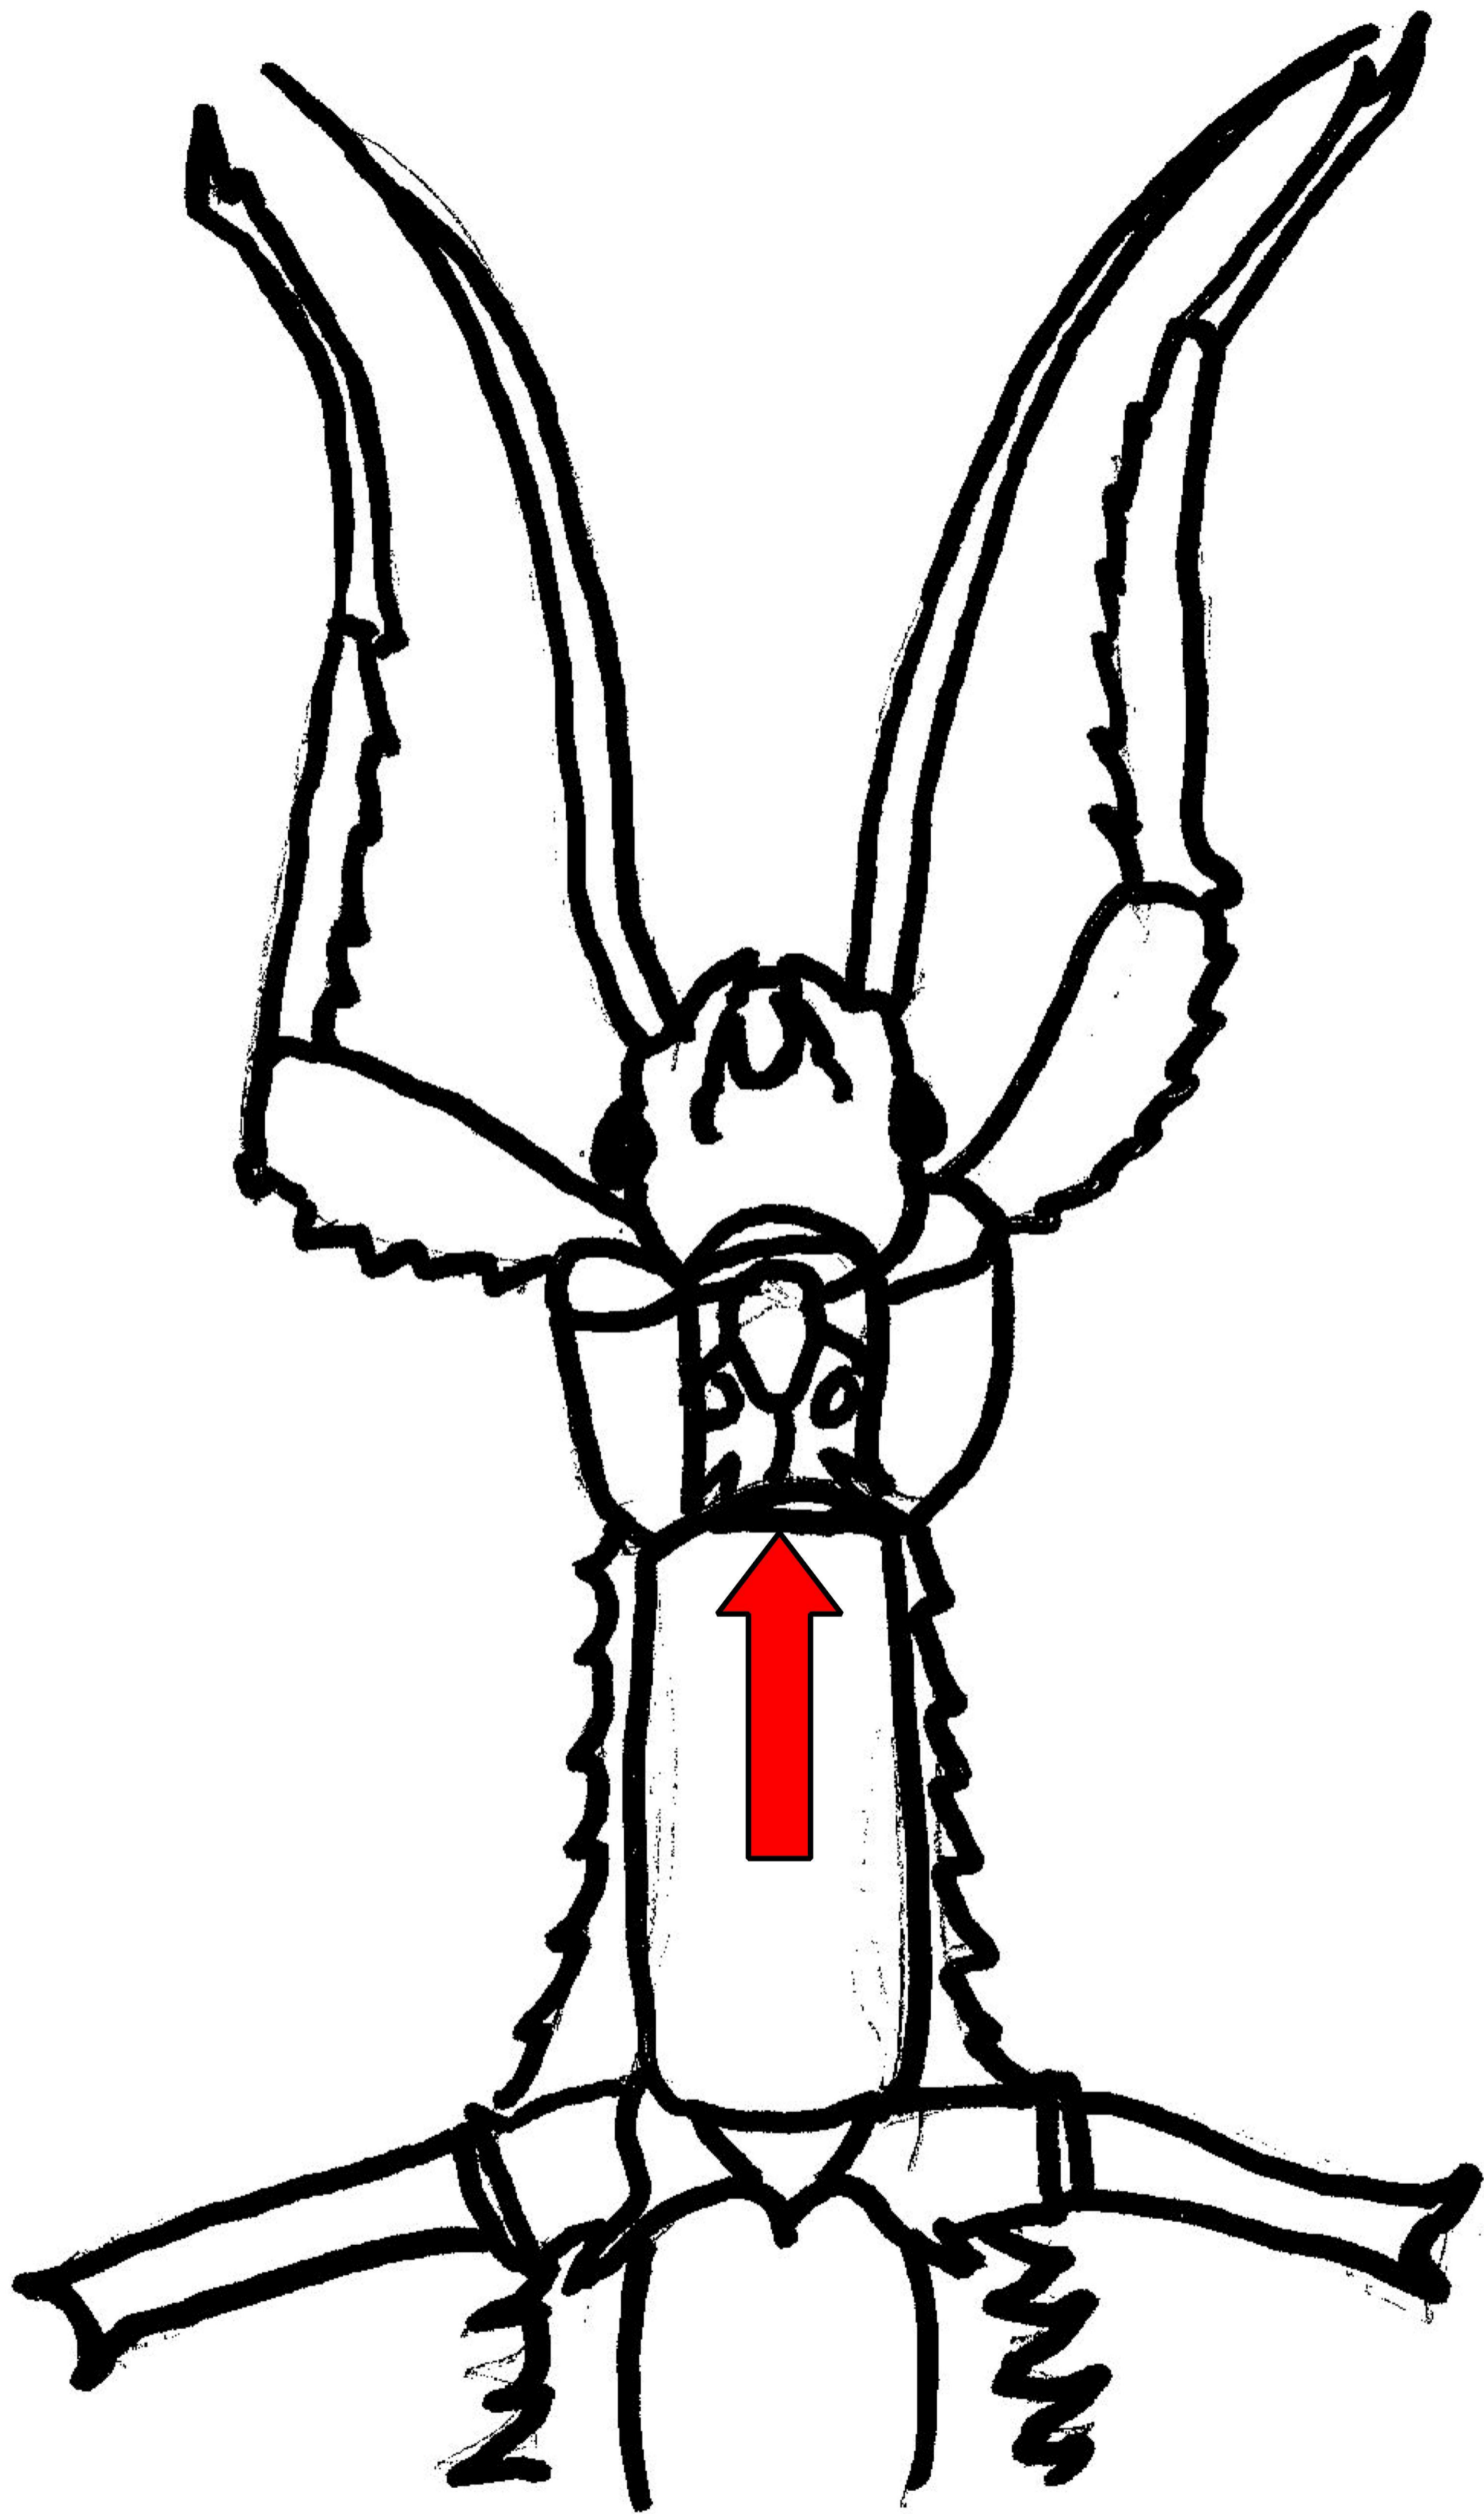

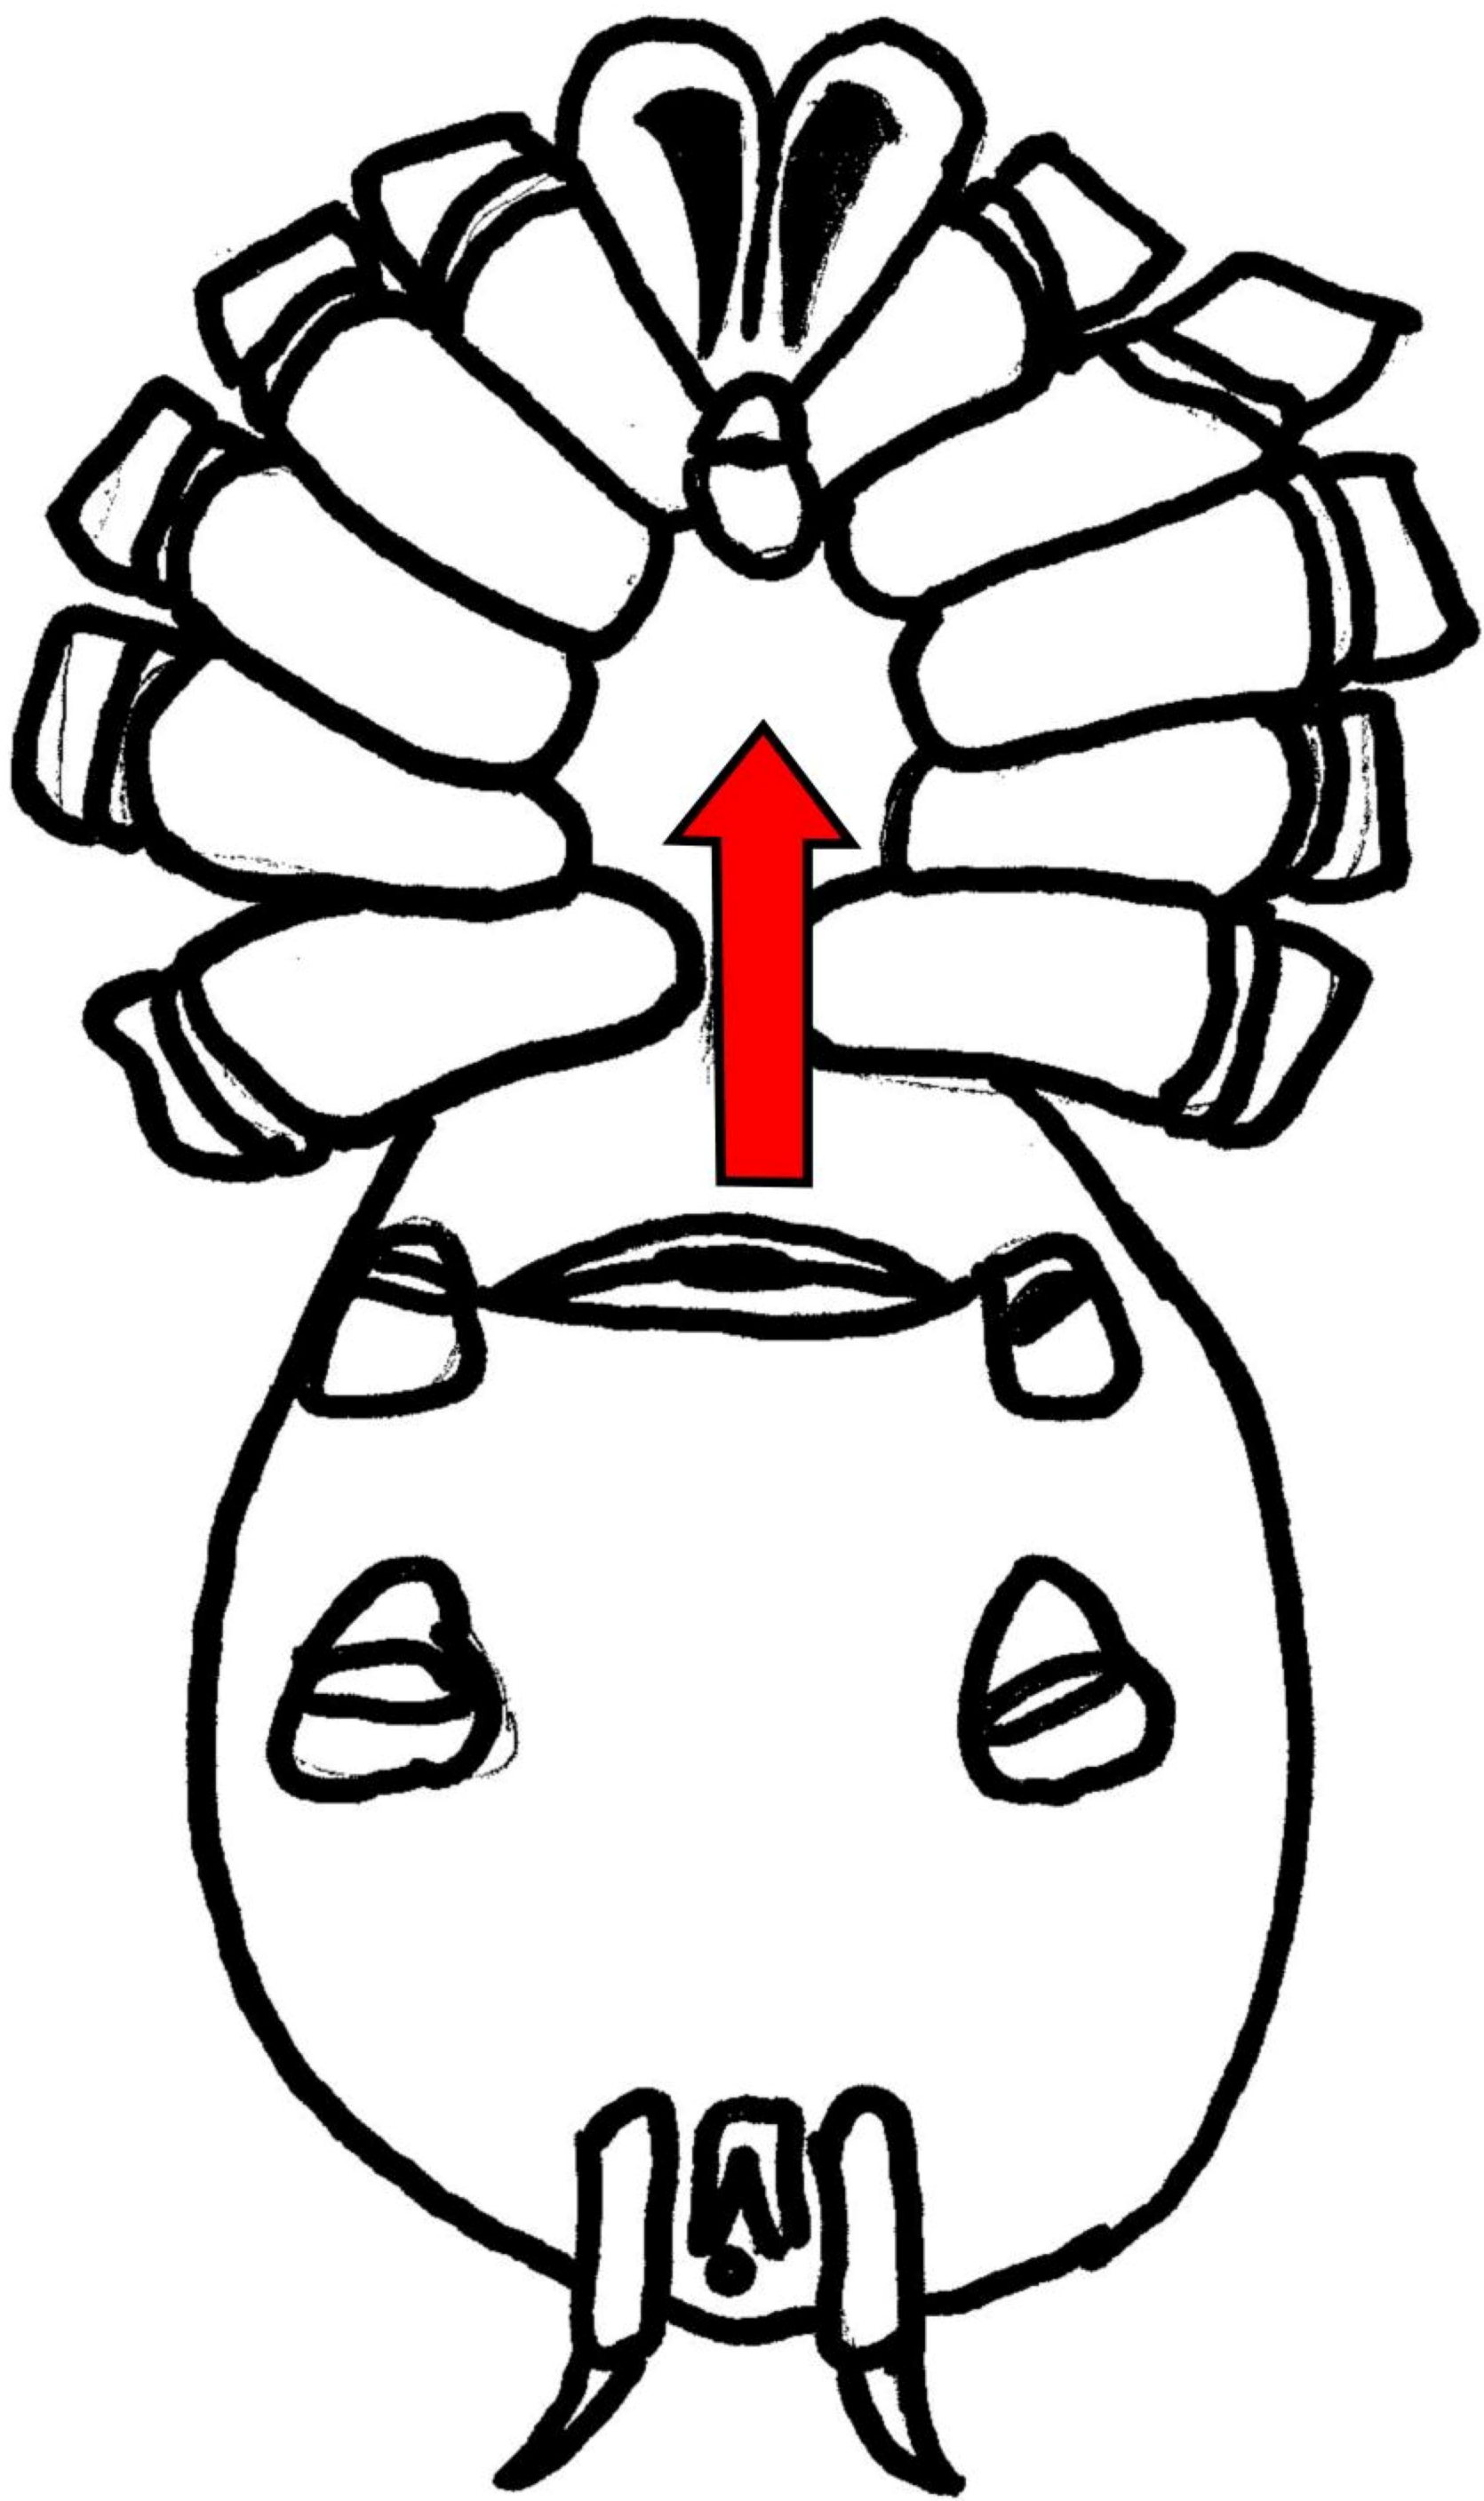

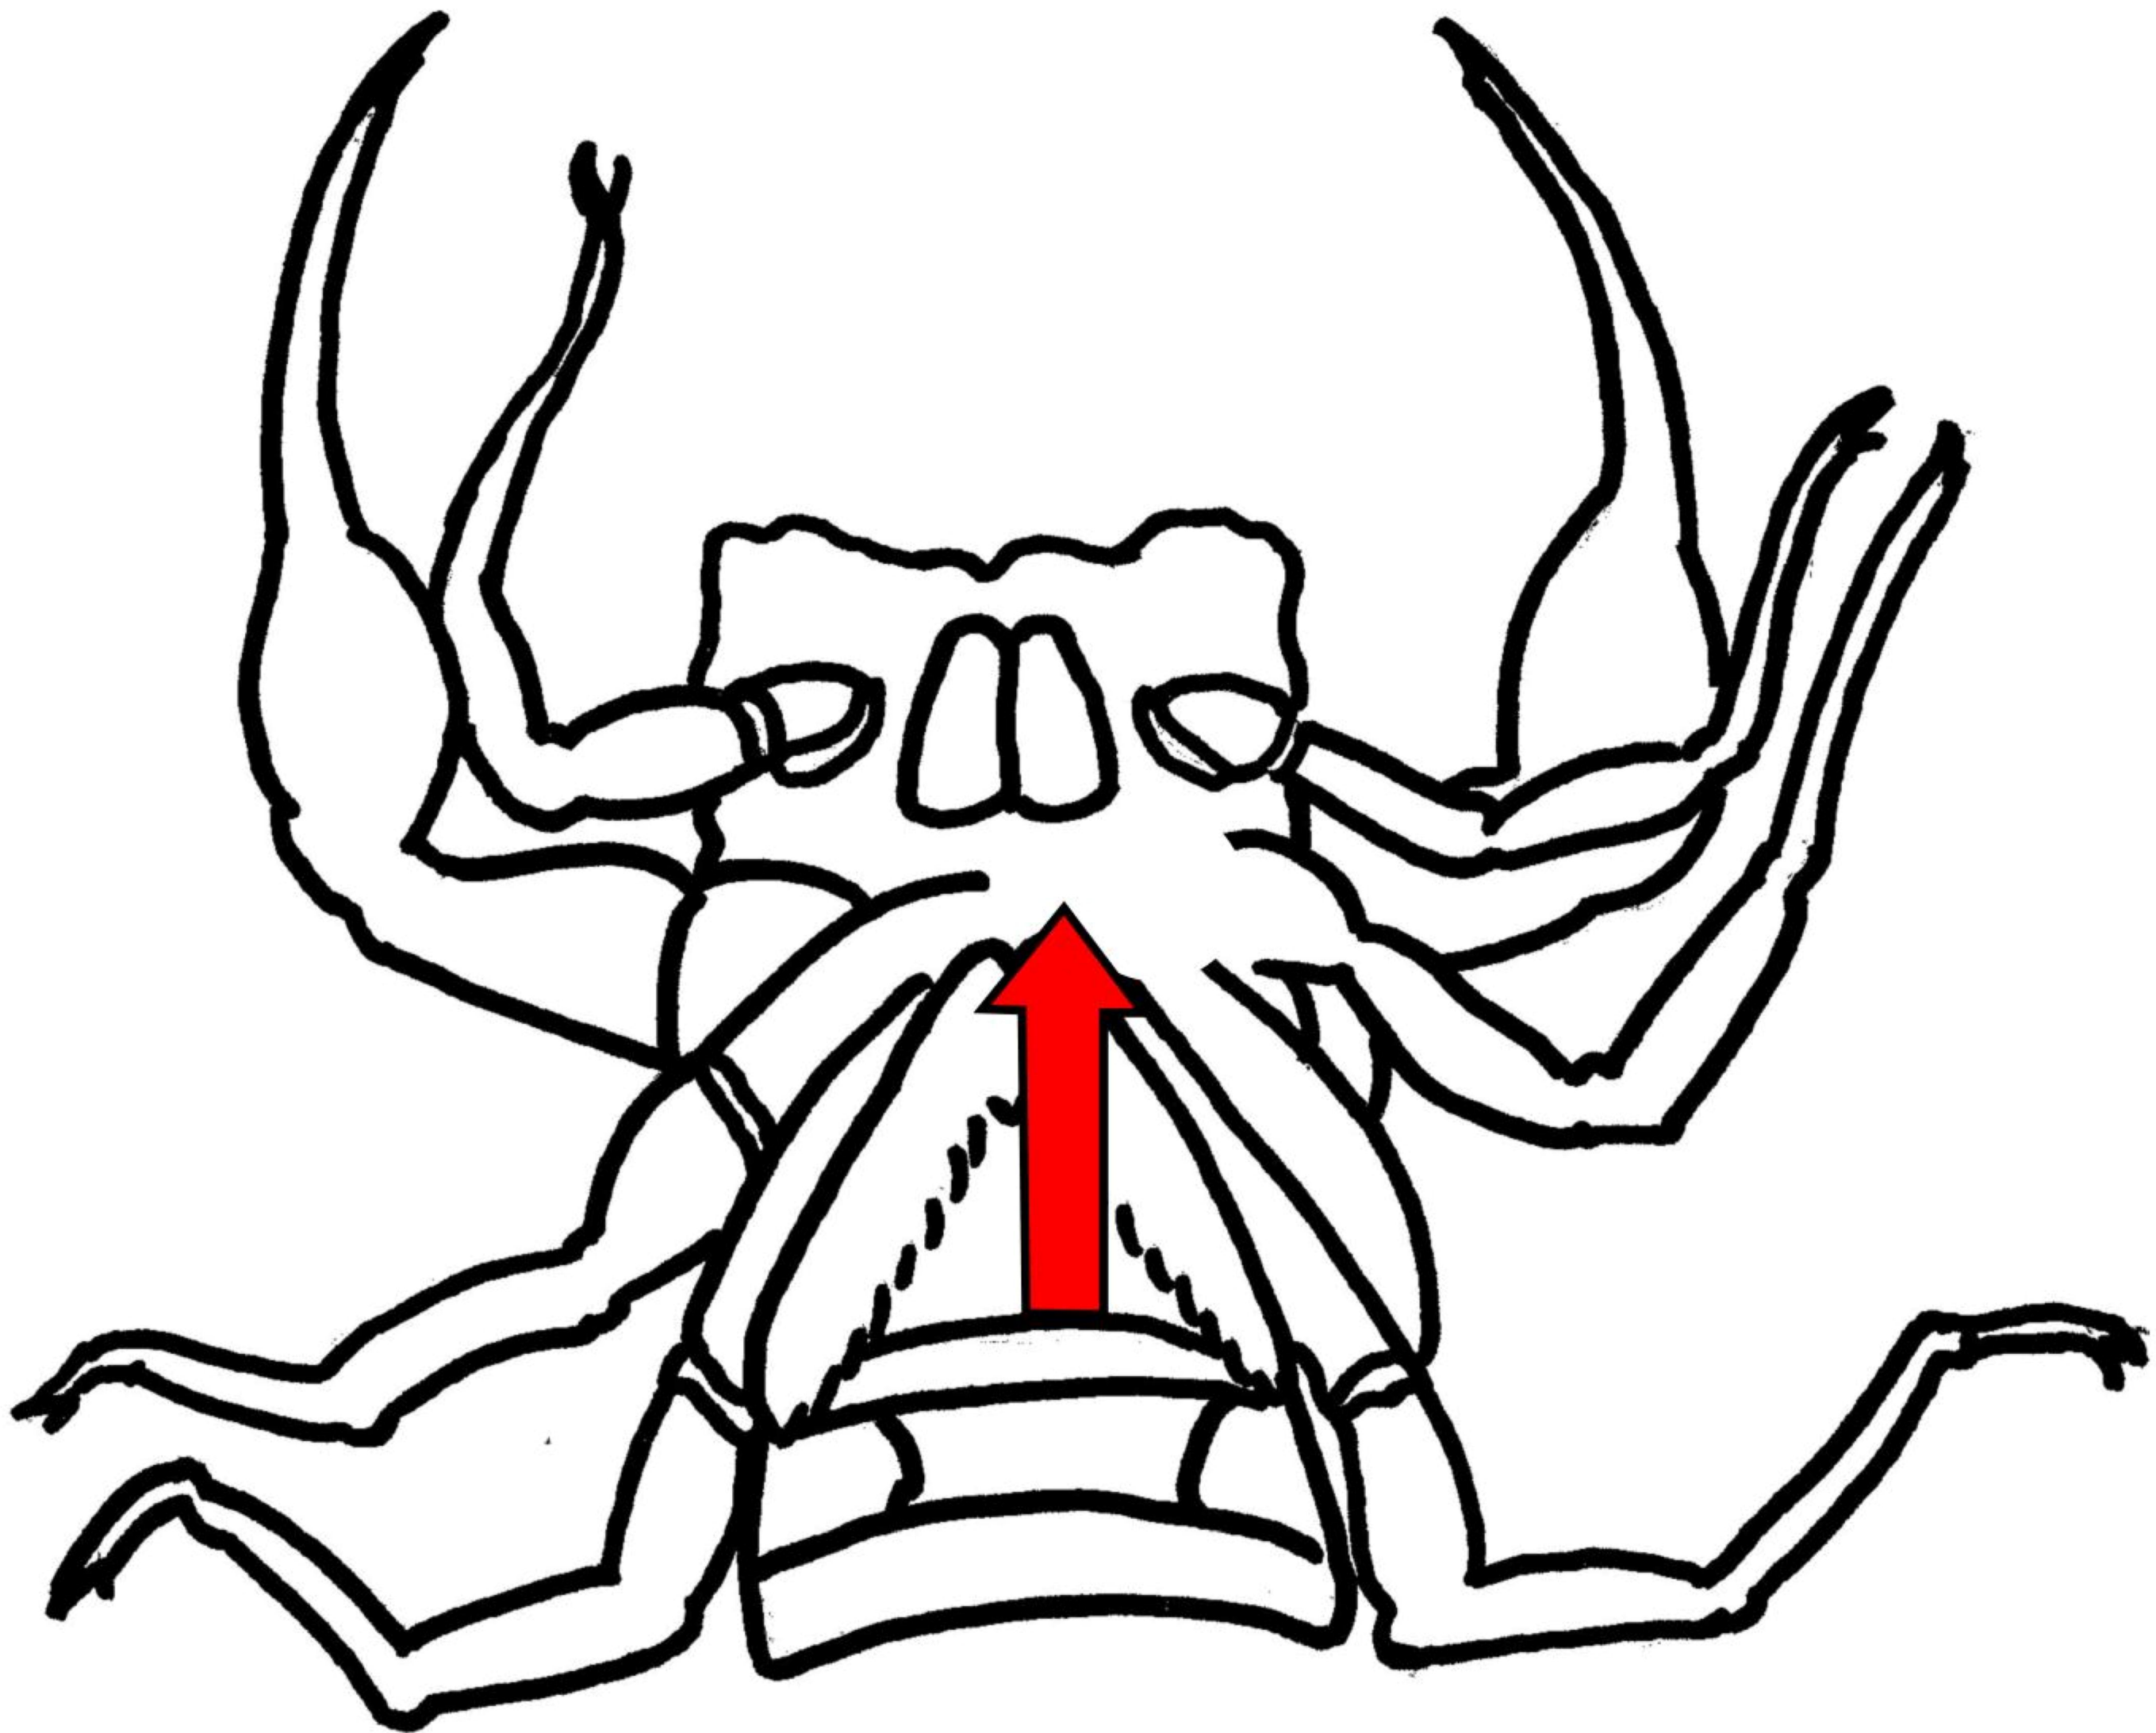

Source: https://cob.silverchair.com/jeb/article-pdf/doi/10.1242/jeb.074997/2036273/jeb_074997.pdf
